7. Nuttall GA, Eckerman KM, Jacob KA, Pawlaski EM, Wigersma SK, Marienau ME, Oliver WC, Narr BJ, Ackerman MJ: Does low-dose droperidol administration increase the risk of drug-induced QT prolongation and torsade de pointes in the general surgical population? *ANESTHESIOLOGY* 2007; 107:531–6
8. McGregor DG, Lanier WL, Pasternak JJ, Rusy DA, Hogan K, Samra S, Hindman B, Todd MM, Schroeder DR, Bayman EO, Clarke W, Torner J, Weeks J, Intraoperative Hypothermia for Aneurysm Surgery Trial Investigators: Effect of nitrous oxide on neurologic and neuropsychological function after intracranial aneurysm surgery. *ANESTHESIOLOGY* 2008; 108:568–79
9. Pasternak JJ, McGregor DG, Lanier WL, Schroeder DR, Rusy DA, Hindman B, Clarke W, Torner J, Todd MM, IHAST Investigators: Effect of nitrous oxide use on long-term neurologic and neuropsychological outcome in patients who received temporary proximal artery occlusion during cerebral aneurysm clipping surgery. *ANESTHESIOLOGY* 2009; 110:563–73
10. Narr BJ, Warner ME, Schroeder DR, Warner MA: Outcomes of patients with no laboratory assessment before anesthesia and a surgical procedure. *Mayo Clin Proc* 1997; 72: 505–9
11. Wilder RT, Flick RP, Sprung J, Katusic SK, Barbaresi WJ, Mickelson C, Gleich SJ, Schroeder DR, Weaver AL, Warner DO: Early exposure to anesthesia and learning disabilities in a population-based birth cohort. *ANESTHESIOLOGY* 2009; 110:796–804
12. Bruewer M, Utech M, Rijcken EJ, Anthoni C, Laukoetter MG, Kersting S, Senninger N, Krieglstein CF: Preoperative steroid administration: Effect on morbidity among patients undergoing intestinal bowel resection in Crohn's disease. *World J Surg* 2003; 27:1306–10

## ANESTHESIOLOGY REFLECTIONS

### *The Waters-Morton House by Vandam*

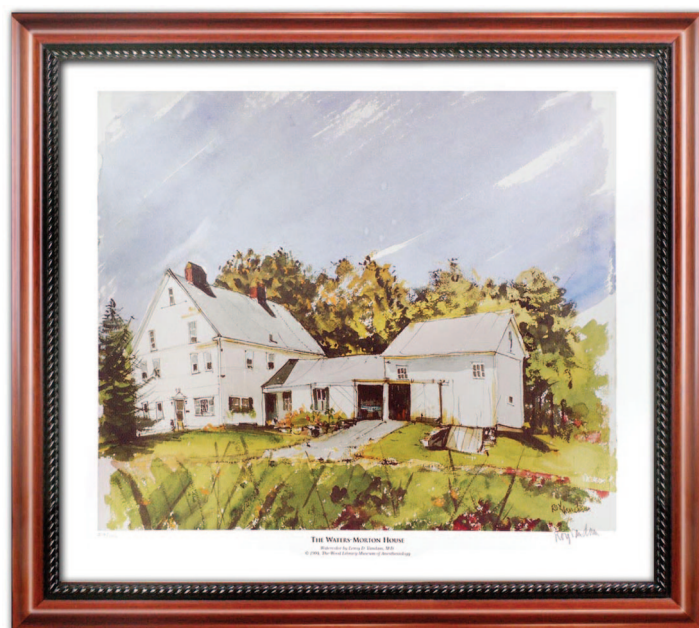

After William T. G. Morton's birthplace had burned to the ground, the 8-yr-old boy's father bought a replacement house in 1827 in Charlton Center, Massachusetts, from the estate of a successful tanner named Israel Waters. Nineteen years later, the younger Morton would publicly demonstrate surgical anesthesia in Boston. The second Morton home, the Waters-Morton House, was memorialized in watercolor (see above) by a retired Editor of *ANESTHESIOLOGY*, Leroy D. Vandam, M.D. (1914–2004). To benefit the Wood Library-Museum, Professor Vandam signed 100 prints of this work, only a few of which remain available for sale. (Copyright © the American Society of Anesthesiologists, Inc. This image appears in color in the *Anesthesiology Reflections* online collection available at [www.anesthesiology.org](http://www.anesthesiology.org).)

George S. Bause, M.D., M.P.H., Honorary Curator, ASA's Wood Library-Museum of Anesthesiology, Park Ridge, Illinois, and Clinical Associate Professor, Case Western Reserve University, Cleveland, Ohio. [UJYC@aol.com](mailto:UJYC@aol.com).
